# Supplementary material for: Highly luminescent Ru(ii) metallopolymers: photonic and redox properties in solution and as thin films
Source: Royal Society of Chemistry journal article supplement (doi:10.1039/c2pp25134e), 2012-07-05
Supplement: c2pp25134e.pdf [file c2pp25134e.pdf]

**Electronic supplementary material for “Highly Luminescent Ru(II) Metallopolymers;  
Photophysics and Electrochemistry in Solution and as Thin Films”**

James J. Walsh,<sup>†</sup> Qiang Zeng,<sup>†</sup> Robert J. Forster\* and Tia E. Keyes\*

National Centre for Sensor Research,  
Biomedical Diagnostics Institute,  
Dublin City University, Dublin 9, Ireland

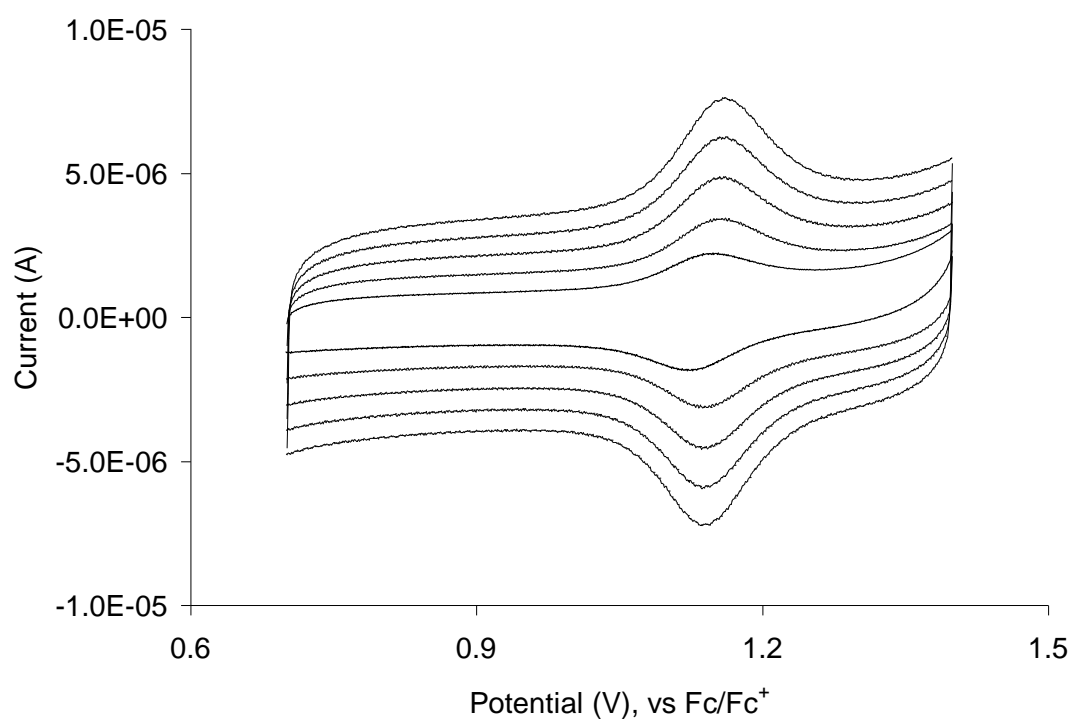

Fig S1: Cyclic voltammograms of a drop-cast thin film of  $[\text{Ru}(\text{bpy})_2(\text{CAIP co-poly})_7]^{2+}$  on a glassy carbon working electrode ( $A = 0.0717 \text{ cm}^2$ ) with 0.1 M  $\text{HClO}_4$  in MeCN as electrolyte. Scan rates (from lowest) were 100, 200, 300, 400 and 500  $\text{mV}\cdot\text{s}^{-1}$ . The reference electrode was an Ag wire (+ 400 mV vs  $\text{Fc}/\text{Fc}^+$ ) and the counter electrode was a Pt wire.

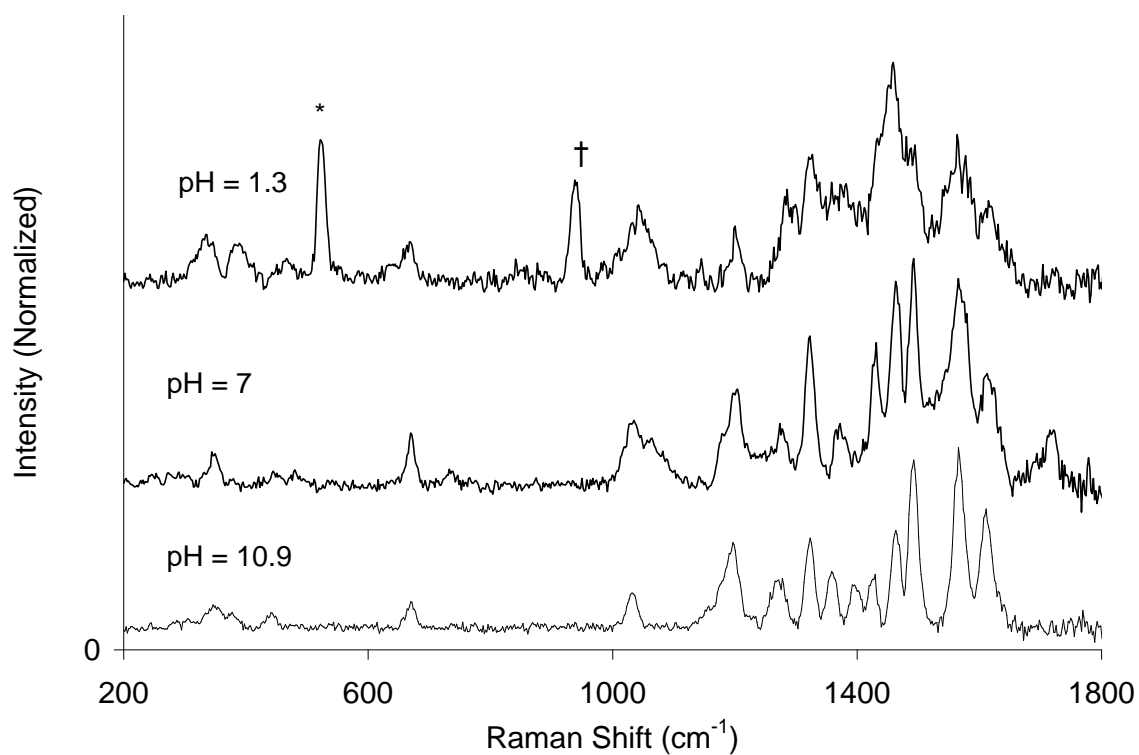

Fig S2: Resonance Raman spectra of thin films of  $[\text{Ru}(\text{bpy})_2(\text{CAIP co-poly})_7]^{2+}$  in its various protonation states drop-cast onto silicon wafer under 488 nm irradiation. \* silica mode; †  $\text{HClO}_4$  mode.

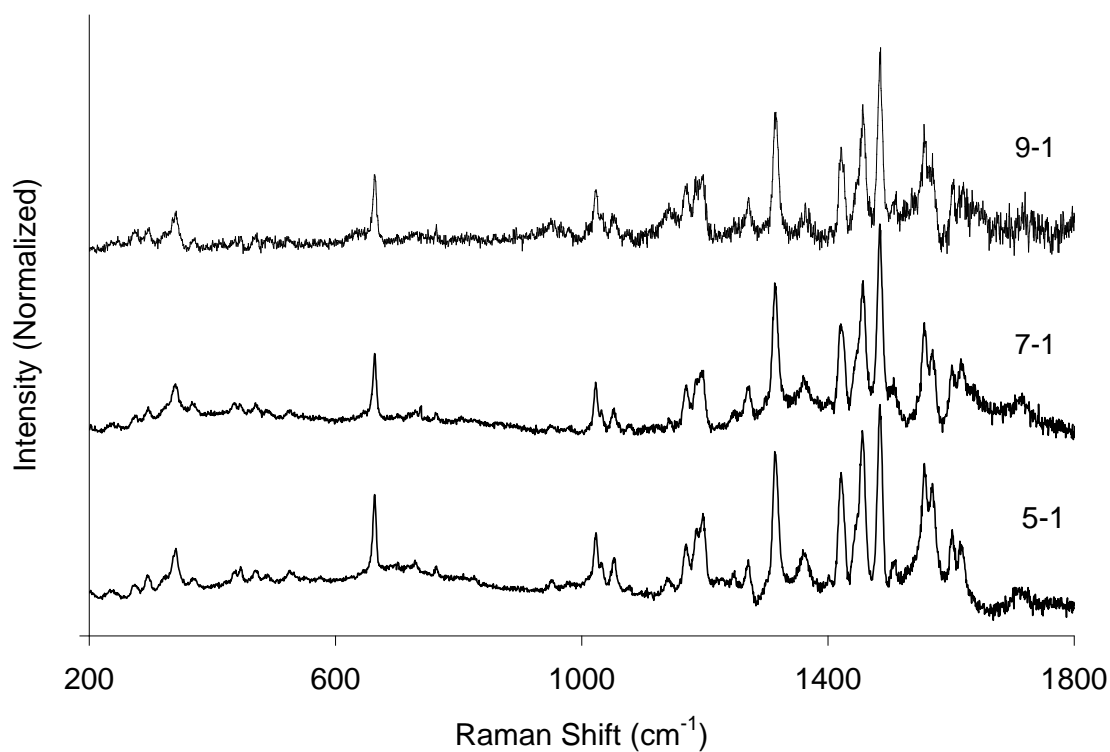

Fig S3: Resonance Raman spectra of all three metallopolymers under 458 nm irradiation.
